# Supplementary material for: Plant Nutrient Contents Rather Than Physical Traits Are Coordinated Between Leaves and Roots in a Desert Shrubland
Source: Front Plant Sci. 2021 Oct 26;12:734775. doi: 10.3389/fpls.2021.734775 (PMC8576145; doi:10.3389/fpls.2021.734775)
Supplement: Supplementary file 2 [file Data_Sheet_2.xlsx]

## Sheet: Sheet1
species	Life form	Fix nitrogen	Evolutionary relationships	SLA	LTD	LN	LP	LN:LP	LC:LN	SRL	RN	RP	RN:RP	RC:RN
				cm2 g-1	g cm-3	g kg-1	g kg-1			m g-1	g kg-1	g kg-1
Chloris virgata	Grass	non-legume	monocot	244.103	0.360924	13.3991	3.45396	3.87949	30.2931	196.696	3.79066	0.975607	3.85286	119.837
Pennisetum centrasiaticum	Grass	non-legume	monocot	243.852	0.345531	18.6587	2.05312	9.08191	21.1497	6.8101	6.31836	1.00358	6.32234	63.0969
Phragmites australis	Grass	non-legume	monocot	109.325	0.461848	17.1984	2.54305	6.84937	25.155	5.63989	2.60837	0.96806	2.71252	166.664
Leymus secalinus	Grass	non-legume	monocot	81.2556	0.645615	22.8625	1.2759	18.0718	19.2112	10.5721	5.44321	0.485151	11.7965	62.2605
Setaria viridis	Grass	non-legume	monocot	268.999	0.295219	17.5806	1.76839	9.95592	22.1977	164.757	5.21124	0.798295	6.52165	84.5161
Stipa glareosa	Grass	non-legume	monocot	130.498	0.842582	12.9811	1.38641	9.42813	31.8534	110.806	3.86688	0.533603	7.22637	83.713
Thermopsis lanceolata	Forb	legume	eudicot	123.644	0.325354	26.4089	1.08462	24.4672	16.4526	9.15982	14.1504	0.826662	18.0043	28.8854
Oxytropis psamocharis	Forb	legume	eudicot	243.996	0.298768	20.3323	1.63177	12.5114	13.8722	9.76344	15.1034	1.83396	8.68751	27.8497
Caragana korshinskii	Forb	legume	eudicot	186.538	0.363864	21.2463	2.10623	10.1185	19.7352	20.6479	21.0524	1.23311	17.2537	20.055
Astragalus galactites	Forb	legume	eudicot	120.052	0.312669	39.1749	1.9545	20.0244	9.47693	12.3415	22.1728	1.46326	15.2055	19.1373
Fabaceae medicago	Forb	legume	eudicot	260.533	0.280576	34.4328	1.84065	18.8098	12.0462	20.8581	25.1463	1.17618	21.4922	15.8922
Astragalus adsurgens	Forb	legume	eudicot	232.245	0.176917	29.1041	1.48199	19.748	12.4747	14.091	19.5431	2.14506	9.12911	20.6504
Astragalus dahuricus	Forb	legume	eudicot	167.544	0.229602	33.0149	1.8391	18.014	12.7998	7.73235	15.5581	1.03998	14.9767	27.6538
Agriophyllum squarrosum	Forb	non-legume	eudicot	118.754	0.398362	15.7354	1.94024	8.05041	25.8502	27.1937	5.64974	1.70301	3.35134	68.532
Corispermum hyssopifolium	Forb	non-legume	eudicot	70.6029	0.471166	7.45371	1.31878	5.65353	53.0614	28.619	6.61839	1.69048	3.89533	64.2169
Euphorbia Esula	Forb	non-legume	eudicot	175.705	0.27654	29.5249	1.6728	17.6525	15.1727	14.9784	10.0604	1.22336	8.2383	40.9711
Inula salsoloides	Forb	non-legume	eudicot	95.6175	0.341166	16.3538	1.89317	8.71104	25.8153	9.87544	7.01096	2.08226	3.39686	54.2363
Silene aprica	Forb	non-legume	eudicot	176.159	0.181912	26.0295	4.57797	5.69442	12.2983	34.5849	10.9854	5.11676	2.15766	36.2151
Linum stelleroides	Forb	non-legume	eudicot	197.588	0.317748	25.0456	2.37681	10.5346	16.3244	11.5446	10.0986	2.1006	4.81653	39.8695
Cynanchum thesioides	Forb	non-legume	eudicot	167.237	0.294265	21.4076	2.80235	7.65089	16.8653	20.856	7.81891	2.49642	3.13832	51.1159
Chenopodium aristatum	Forb	non-legume	eudicot	130.863	0.332649	13.7863	1.94373	7.10629	26.2212	40.3782	7.01739	1.37961	5.08403	61.2239
Bassia dasyphylla	Forb	non-legume	eudicot	113.999	0.163713	7.6005	1.72562	4.39524	45.3249	28.6191	6.18137	1.74706	3.47564	75.9471
Euphorbia humifusa	Forb	non-legume	eudicot	212.919	0.277032	17.2594	2.73645	6.41054	22.3829	52.1984	11.5997	1.68178	6.8973	39.924
Cynanchum chinense	Forb	non-legume	eudicot	192.951	0.18393	39.7267	3.2631	12.4036	10.8696	9.39165	9.76802	1.4016	7.03399	43.6977
Incarvillea sinensis	Forb	non-legume	eudicot	208.816	0.159753	26.1109	2.05746	12.799	15.9732	16.979	14.42	1.8754	7.68438	29.5358
Mulgedium tataricum	Forb	non-legume	eudicot	228.052	0.149977	19.0111	2.53222	7.58358	19.0887	14.3349	4.76362	2.53449	1.88879	80.655
Heteropappus altaicus	Forb	non-legume	eudicot	168.959	0.208706	20.7016	1.85052	11.1962	16.1482	24.6025	10.496	1.21011	8.67549	36.676
Sonchus arvensis	Forb	non-legume	eudicot	274.959	0.143246	19.3831	2.06543	9.40964	18.3143	16.3246	4.27843	1.40948	3.04019	85.6116
Ixeridium gracile	Forb	non-legume	eudicot	215.02	0.276036	20.1161	2.59008	7.75905	19.495	15.5069	6.46811	1.92885	3.35434	60.8405
Inula japonica	Forb	non-legume	eudicot	227.851	0.243093	10.5559	1.52669	6.92916	27.4876	41.9396	7.07722	1.50958	4.68858	50.695
Messerschmidia sibirica	Forb	non-legume	eudicot	161.071	0.276592	13.479	2.04415	6.5755	24.0373	8.80894	5.64391	1.81609	3.11976	69.553
Chenopodium glaucum	Forb	non-legume	eudicot	157.662	0.289052	35.7782	3.31607	10.9679	9.04315	40.9672	10.3915	2.36137	4.39727	39.163
Saussurea japonic	Forb	non-legume	eudicot	213.95	0.14901	21.7111	1.73918	12.5741	16.7343	20.3792	10.8566	1.47969	7.40459	37.1433
Melilotus officinalis	Forb	legume	eudicot	158.06	0.354893	31.8242	1.45769	21.989	12.3891
Plantago asiatica	Forb	non-legume	eudicot	162.799	0.249026	16.4998	2.24758	7.34256	19.8665
Malva rotundifolia	Forb	non-legume	eudicot	240.975	0.146424	34.0221	3.17963	10.7568	10.9976
Glycyrrhiza uralensis	Forb	legume	eudicot	146.154	0.316045	21.5315	1.26574	17.0106	18.2267
Onopordum acanthium	Forb	non-legume	eudicot	81.9529	0.496372	13.1248	1.16978	11.1781	18.6891
Lespedeza davurica	Woody	legume	eudicot	155.689	0.38128	27.3767	2.05972	13.3249	14.3794	12.1649	13.6555	1.49838	9.15742	35.1801
Caragana korshinskii	Woody	legume	eudicot	131.408	0.416638	38.3097	1.99859	19.2976	12.0492	13.8532	14.4211	0.898905	16.0275	29.5541
Hedysarum mongolicum	Woody	legume	eudicot	103.763	0.373042	25.6581	1.6219	15.9151	17.651	8.5412	14.2003	0.91253	16.058	33.5437
Sophora alopecuroides	Woody	legume	eudicot	139.94	0.381263	39.6279	1.82449	21.778	11.4379	8.58676	11.4237	0.747021	16.3325	39.7404
Periploca sepium	Woody	non-legume	eudicot	270.969	0.214484	25.7468	3.15929	8.14702	16.4135	11.5644	6.81225	2.13604	3.20166	65.8446
Cynanchum komarovii	Woody	non-legume	eudicot	107.486	0.321439	27.4615	1.98252	13.9501	15.6647	13.563	5.83449	0.911603	7.64391	79.4613
Atraphaxis frutescens	Woody	non-legume	eudicot	94.0024	0.367497	21.4866	1.58953	13.5325	19.592	19.901	4.93039	1.01625	4.96282	93.2891
Salix cheilophila	Woody	non-legume	eudicot	114.247	0.516157	21.1898	2.16129	9.83948	22.5864	11.2896	5.13242	1.05816	4.8657	86.1858
Caryopteris mongholica	Woody	non-legume	eudicot	117.303	0.350411	16.5737	3.90056	4.33163	27.9163	22.4173	5.25103	1.78563	2.94401	88.4267
Artemisia ordosica	Woody	non-legume	eudicot	103.533	0.355765	20.332	2.55481	10.0321	22.9401	22.8718	7.14901	1.67243	6.4628	63.4883
